# Supplementary material for: Natural killer cells suppress cancer metastasis by eliminating circulating cancer cells
Source: Frontiers journal article supplement (doi:10.3389/fimmu.2022.1098445), 2023-01-17
Supplement: Data_Sheet_1.pdf [file Data_Sheet_1.pdf]

## **Supplementary Material**

**Title: Natural killer cells suppress cancer metastasis by eliminating circulating cancer cells**

Maulik Vyas<sup>1</sup>, Marta Requesens<sup>1</sup>, Thao H. Nguyen<sup>1</sup>, Domitille Peigney<sup>1</sup>, Marjan Azin<sup>1</sup>, Shadmehr Demehri<sup>1\*</sup>

## SUPPLEMENTARY FIGURES

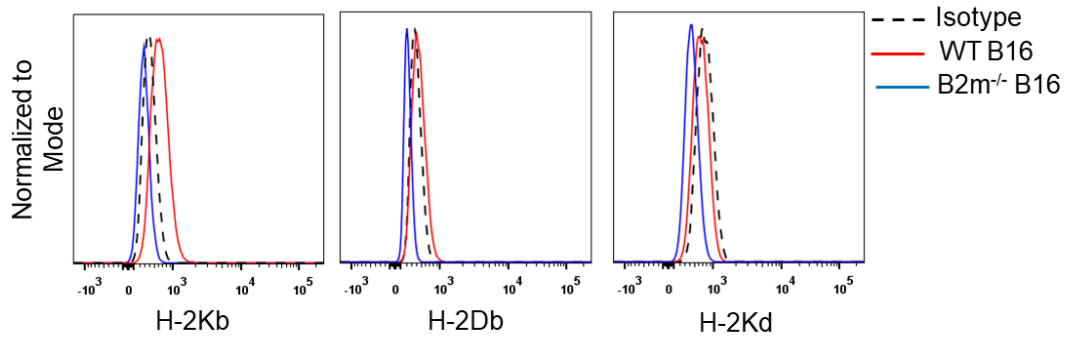

**Figure S1. MHC-I expression on WT and B2m<sup>-/-</sup> B16 cells.** The expression of MHC-I alloantigens H-2Kb (C57BL/6), H-2Db (C57BL/6) and H-2Kd (BALB/c) were examined on the surface of WT and B2m<sup>-/-</sup> B16 melanoma cells.

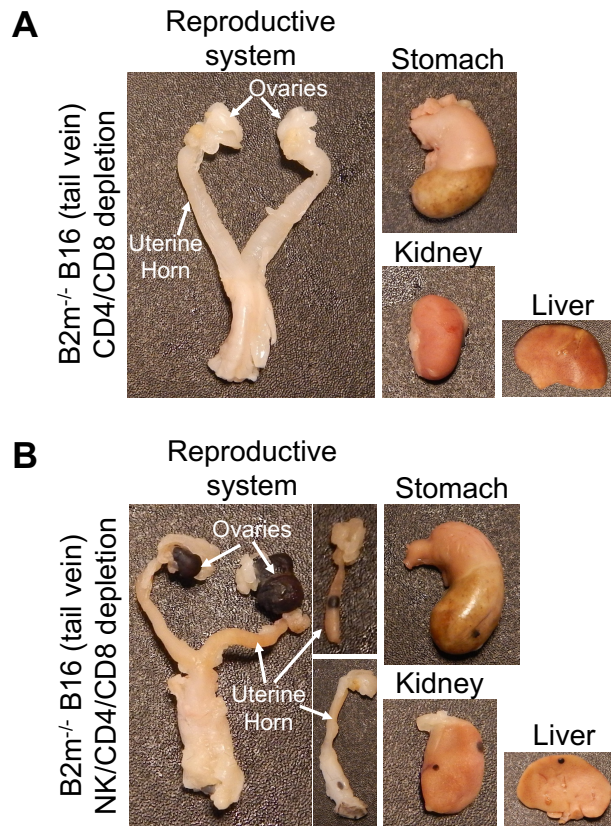

**Figure S2. NK and T cell depletion results in extrapulmonary metastases of B16 melanoma.**

**(A, B)** Representative macroscopic images of extrapulmonary metastases of B2m<sup>-/-</sup> B16 melanoma following tail vein IV injection and treatment with anti-CD4/CD8 (A) and anti-NK1.1/CD4/CD8 (B) antibodies.

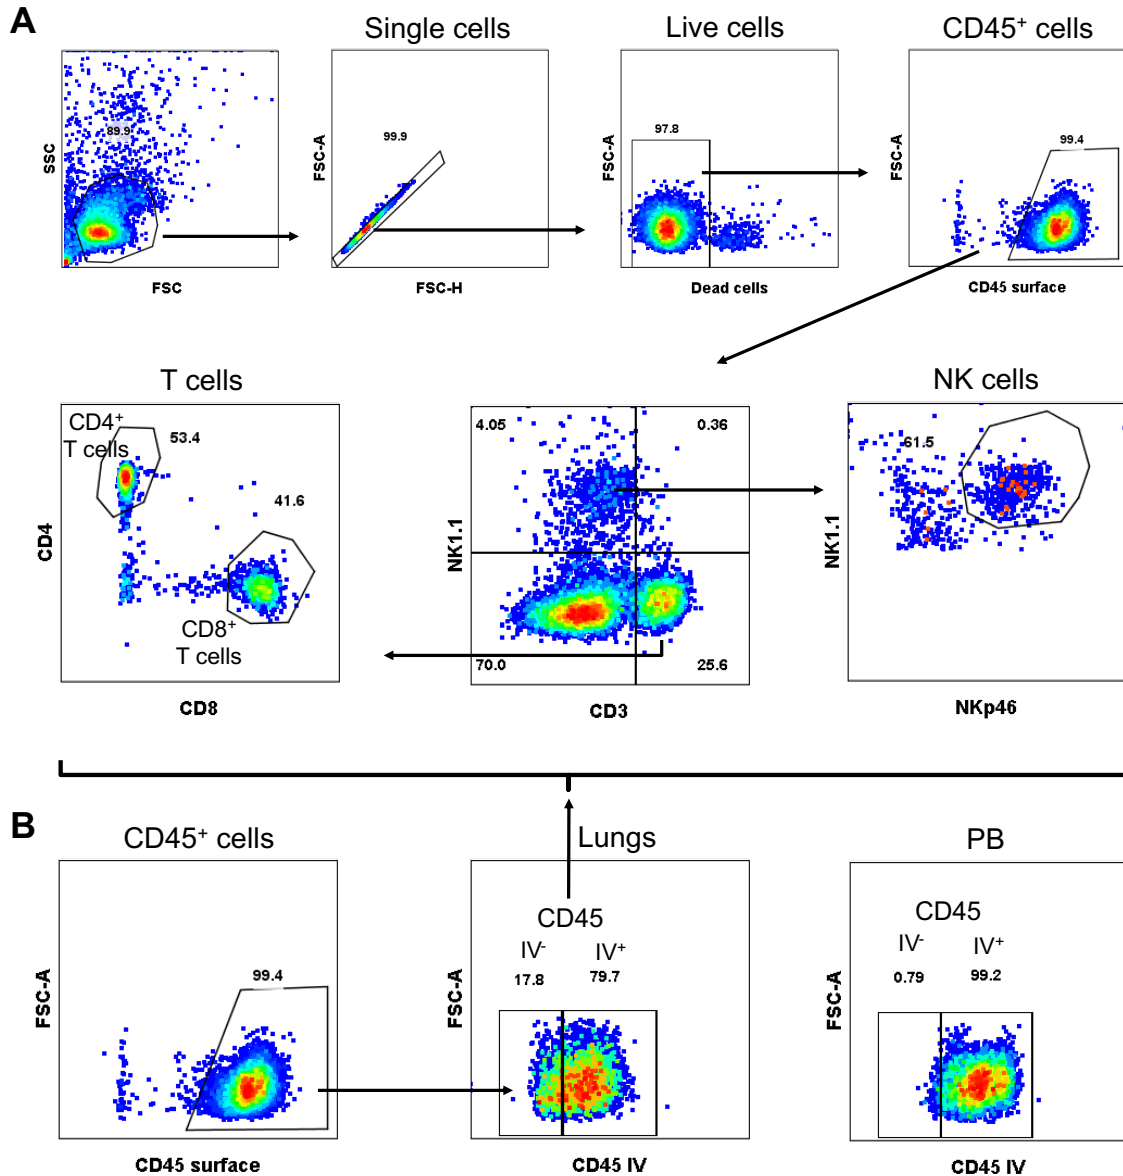

**Figure S3. Gating strategy to detect total and tissue infiltrating ( $IV^{neg}$ ) NK and T cells.** For specific evaluation of the immune cells infiltrating into the lung tissue, fluorescently labeled anti-CD45 antibody was intravenously administered to mice 3 minutes before organ harvest. CD45-stained immune cells from the vasculature are termed as CD45  $IV^{+}$  while tissue-resident/emigrated immune cells which remained unstained by intravenously injected CD45 antibody are termed as CD45  $IV^{-}$ . Following the organ harvest, immune cells were *ex vivo* stained by distinctly labeled CD45 antibody (“CD45 surface”) to stain all immune cells. **(A)** Total CD45 $^{+}$

immune cells gated among forward/side scatter-based singlets gate followed by fixable live/dead stain negative live cells gate. Total NK cells were subsequently detected by gating for CD3<sup>-</sup>, NK1.1<sup>+</sup>, NKp46<sup>+</sup> population. Total CD4<sup>+</sup> and CD8<sup>+</sup> T cells were detected by gating for NK1.1<sup>-</sup>, CD3<sup>+</sup>, CD4<sup>+</sup> or CD8<sup>+</sup> populations. **(B)** To detect circulating versus tissue-infiltrating immune cells in the lung, total *ex vivo* labeled CD45<sup>+</sup> immune cells were gated for CD45 IV<sup>+</sup> (IV<sup>pos</sup>) and CD45 IV<sup>-</sup> (IV<sup>neg</sup>) populations accounting for circulating and tissue-infiltrating immune cells. The gating of CD45 IV<sup>+</sup> (IV<sup>pos</sup>) and CD45 IV<sup>-</sup> (IV<sup>neg</sup>) immune cells among total CD45<sup>+</sup> cells was generated based on the peripheral blood (PB) sample where all CD45<sup>+</sup> immune cells were CD45 IV<sup>+</sup> (IV<sup>pos</sup>) (i.e., fluorescently labeled by intravenously injected CD45 antibody). CD45 IV<sup>-</sup> (IV<sup>neg</sup>) NK cells and CD4<sup>+</sup>/CD8<sup>+</sup> T cells were further detected as described in (A).

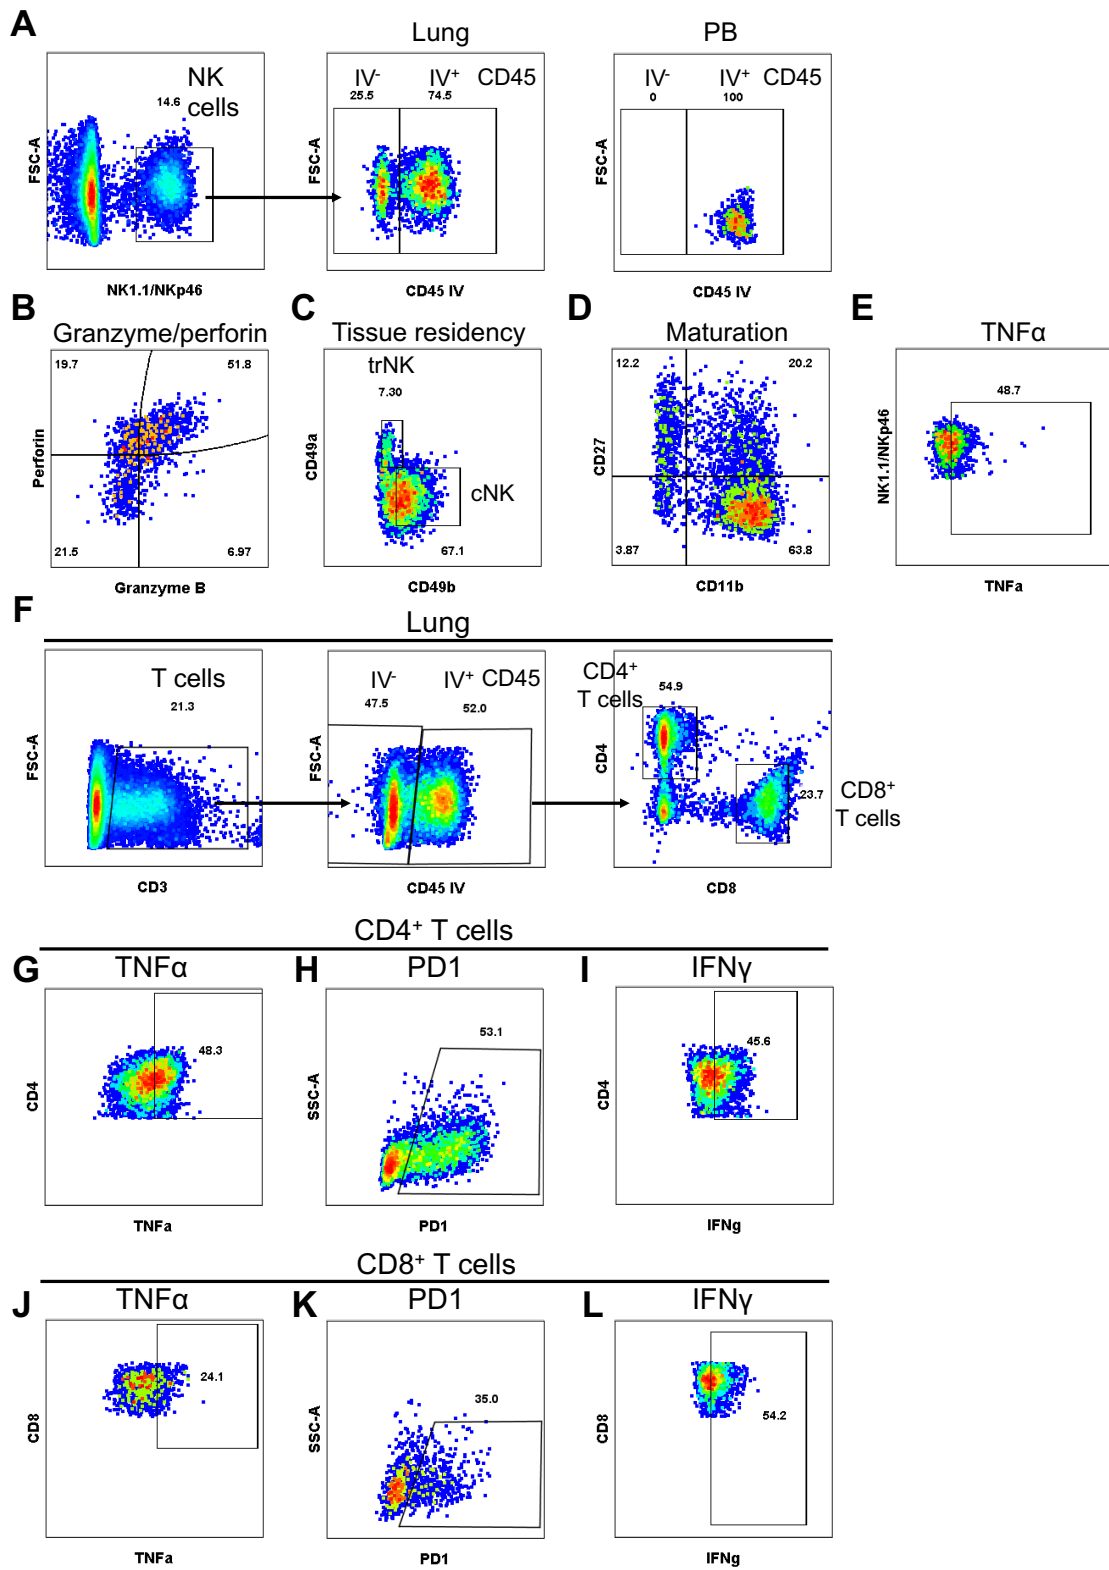

**Figure S4. Gating strategy for functional characterization of Lung IV<sup>pos</sup> and IV<sup>neg</sup> NK and T cells.** **(A)** NK cells detected by gating for CD3<sup>-</sup>, NK1.1/ NKp46<sup>+</sup> population. To detect circulating versus tissue-infiltrating immune cells, mice were intravenously injected with fluorescently labeled CD45 antibody 3 minutes before organ harvest to fluorescently label all CD45<sup>+</sup> immune cells in the vasculature. The gating of CD45 IV<sup>+</sup> (IV<sup>pos</sup>) and CD45 IV<sup>-</sup> (IV<sup>neg</sup>) NK cells among total NK cells was generated based on the peripheral blood (PB) sample where all NK cells were CD45 IV<sup>+</sup> (IV<sup>pos</sup>) (i.e., fluorescently labeled by intravenously injected CD45 antibody). **(B-E)** CD45 IV<sup>+</sup> (IV<sup>pos</sup>) and CD45 IV<sup>-</sup> (IV<sup>neg</sup>) lung NK cells gated for granzyme B/perforin (B), CD49b/CD49a (C), CD11b/CD27 (D), and TNF $\alpha$  (E) based on the Fluorescence Minus One (FMO) controls. **(F)** T cells detected by gating for CD3<sup>+</sup>, NK1.1/ NKp46<sup>-</sup> population. The gating of CD45 IV<sup>+</sup> (IV<sup>pos</sup>) and CD45 IV<sup>-</sup> (IV<sup>neg</sup>) T cells was generated as for NK cells and were subsequently gated for CD4<sup>+</sup> and CD8<sup>+</sup> T cells. **(G-L)** CD45 IV<sup>+</sup> (IV<sup>pos</sup>) and CD45 IV<sup>-</sup> (IV<sup>neg</sup>) lung CD4<sup>+</sup> (G, H, I) and CD8<sup>+</sup> (J, K, L) T cells were further gated for TNF $\alpha$  (G, J), PD1 (H, K), and IFN $\gamma$  (I, L) based on the FMO controls.

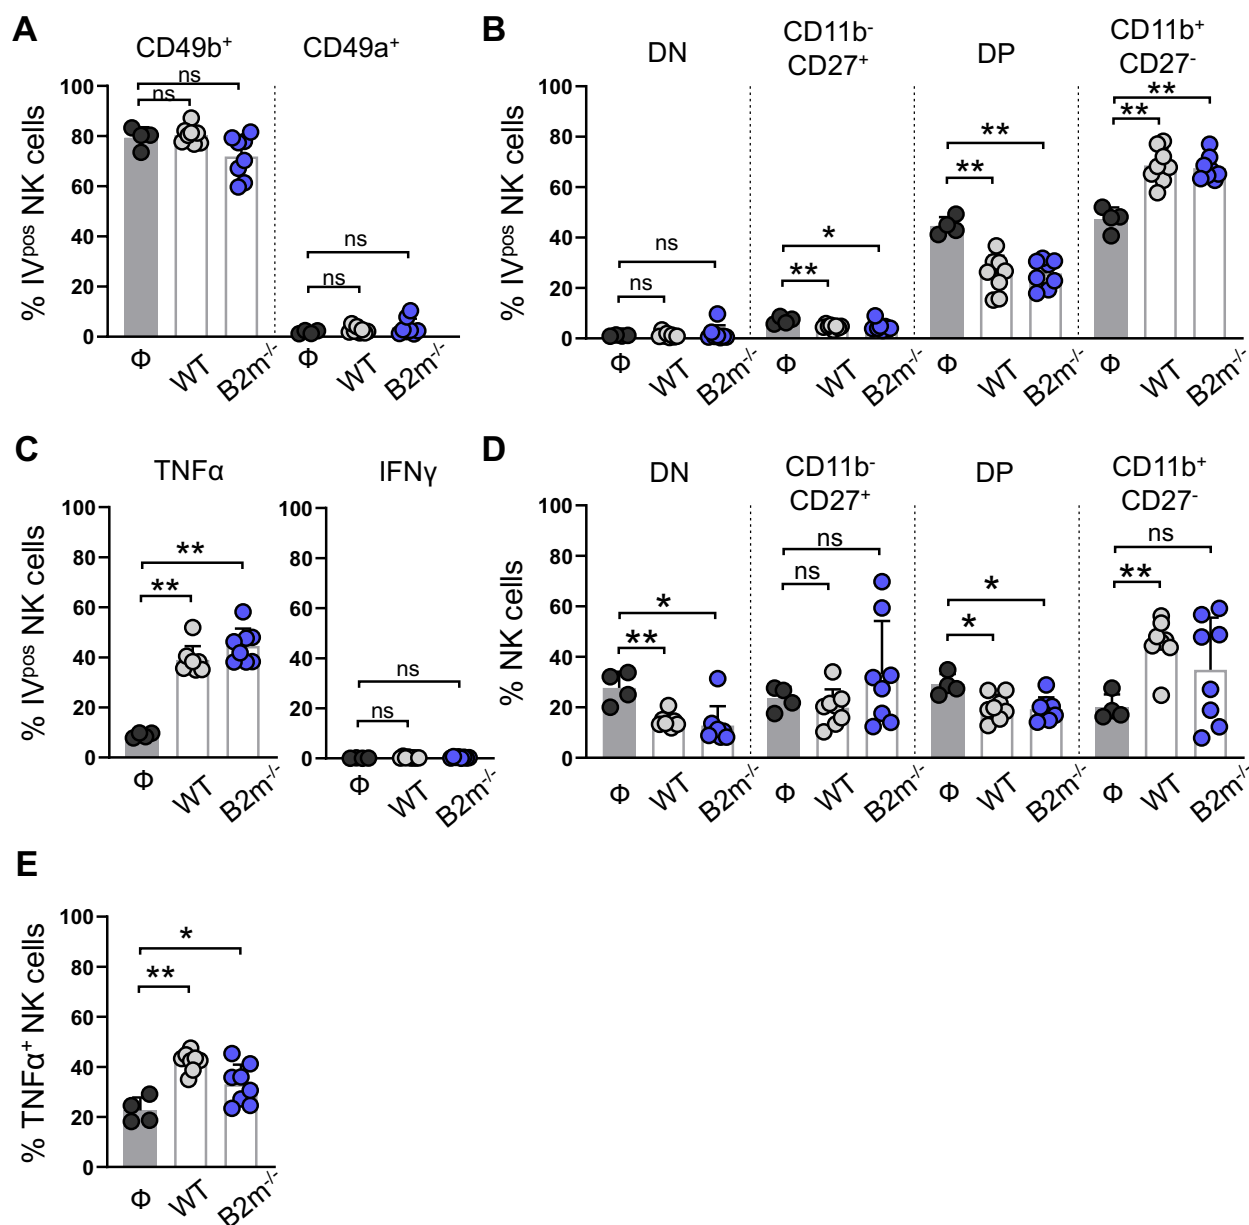

**Figure S5. Characterization of lung and liver NK cells in response to metastatic melanoma.**

**(A)** Quantification of conventional (CD49b<sup>+</sup>) and tissue-resident (CD49a<sup>+</sup>) circulating (IV<sup>pos</sup>) NK cells in the lung at day 14 after WT B16 (WT) and B2m<sup>-/-</sup> B16 (B2m<sup>-/-</sup>) melanoma tail vein IV injection in comparison with untreated mice (Φ). **(B)** Quantification of maturation status defined by CD11b and CD27 expression in circulating (IV<sup>pos</sup>) NK cells in the lung at day 14 after WT B16 (WT) and B2m<sup>-/-</sup> B16 (B2m<sup>-/-</sup>) melanoma tail vein IV injection in comparison with untreated mice (Φ).



(Φ). **(C)** Quantification of  $\text{TNF}\alpha^+$  and  $\text{IFN}\gamma^+$  circulating ( $\text{IV}^{\text{pos}}$ ) NK cells in the lung at day 14 after WT B16 (WT) and  $\text{B2m}^{-/-}$  B16 ( $\text{B2m}^{-/-}$ ) melanoma tail vein IV injection in comparison with untreated mice (Φ). **(D)** Quantification of maturation status defined by CD11b and CD27 expression in liver NK cells at day 14 after WT B16 (WT) and  $\text{B2m}^{-/-}$  B16 ( $\text{B2m}^{-/-}$ ) melanoma tail vein IV injection in comparison with untreated mice (Φ). **(E)** Quantification of  $\text{TNF}\alpha^+$  liver NK cells at day 14 after WT B16 (WT) and  $\text{B2m}^{-/-}$  B16 ( $\text{B2m}^{-/-}$ ) melanoma tail vein IV injection in comparison with untreated mice (Φ).  $n = 4-8$  mice per group. Graphs show mean + SD. Mann-Whitney  $U$  test, ns: not significant, \*  $p < 0.05$ , \*\*  $p < 0.01$ .

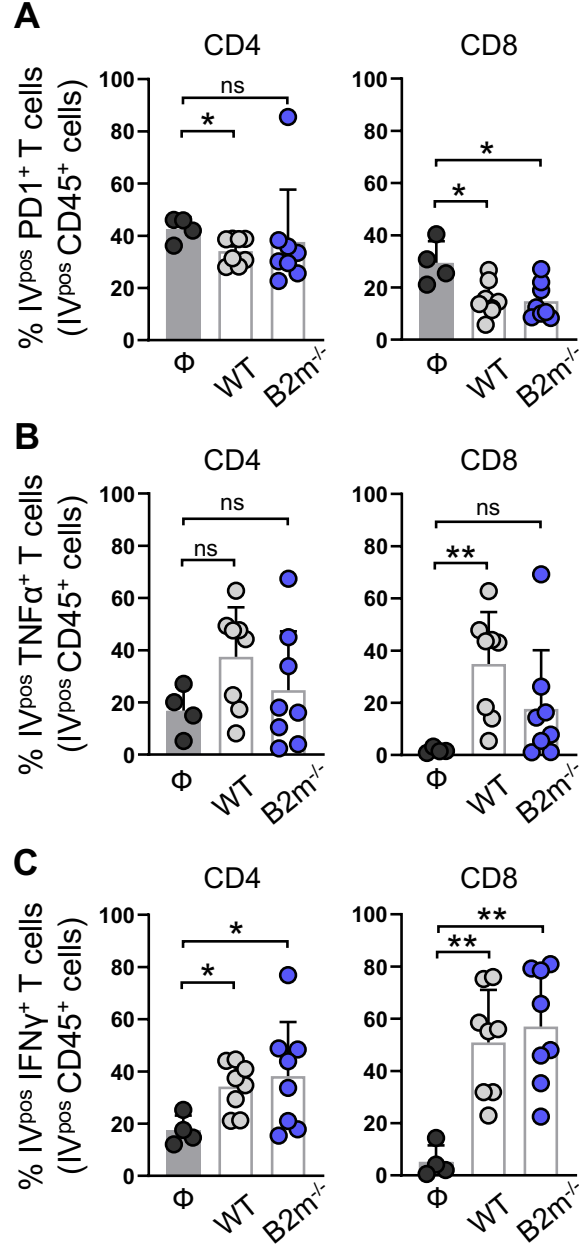

**Figure S6. Characterization of circulating T cells in the lung in response to metastatic melanoma.** (A-C) Quantification of PD1<sup>+</sup> (A), TNFα<sup>+</sup> (B), and IFNγ<sup>+</sup> (C) circulating (IV<sup>pos</sup>) CD4<sup>+</sup> and CD8<sup>+</sup> T cells in the lung at day 14 after WT B16 (WT) and B2m<sup>-/-</sup> B16 (B2m<sup>-/-</sup>) melanoma tail vein IV injection in comparison with untreated mice (Φ). n = 4-8 mice per group. Graphs show mean + SD. Mann-Whitney *U* test, ns: not significant, \* *p* < 0.05, \*\* *p* < 0.01.

## SUPPLEMENTARY TABLE

**Table S1. Antibodies used for immune cell analysis.**

| <b><u>Immunostaining Antibodies</u></b>              | <b><u>Clone</u></b> | <b><u>Company</u></b>                  |
|------------------------------------------------------|---------------------|----------------------------------------|
| Rat Anti-Mouse CD3                                   | CD3-12              | Abcam, Cambridge, MA                   |
| Rabbit Anti-Mouse CD8                                | D4W2Z               | Cell Signaling Technology, Danvers, MA |
| Rabbit Anti-Mouse CD4                                | EPR19514            | Abcam                                  |
| <b><u>Secondary Antibodies and staining kits</u></b> |                     |                                        |
| Goat anti-Rat IgG, Alexa Fluor® 568 conjugate        |                     | Thermo Fisher Scientific, Waltham, MA  |
| Goat anti-Rabbit IgG, Alexa Fluor® 488 conjugate     |                     | Thermo Fisher Scientific               |
| <b><u>Flow Cytometry Antibodies</u></b>              |                     |                                        |
| <b><i>Mouse</i></b>                                  |                     |                                        |
| CD3-BUV395                                           | 145-2C11            | BioLegend                              |
| CD3-APC-Cy7                                          | 145-2C11            | BioLegend                              |
| CD3-PerCP-Cy5.5                                      | 145-2C11            | BioLegend                              |
| CD4-APC-Cy7                                          | GK1.5               | BioLegend                              |
| CD4-eF450                                            | GK1.5               | BioLegend                              |
| CD4-PerCP-Cy5.5                                      | GK1.5               | BioLegend                              |
| CD8-PE                                               | 53-6.7              | BioLegend                              |
| CD8-APC-Cy7                                          | 53-6.7              | BioLegend                              |
| CD8-BUV395                                           | 53-6.7              | BioLegend                              |
| CD45-BV605                                           | 30-F11              | BioLegend                              |
| CD45-APC                                             | 30-F11              | BioLegend                              |
| CD27-PE-Cy7                                          | LG.3A10             | BioLegend                              |
| Perforin-PE                                          | S16009A             | BioLegend                              |
| CD19-APC-Cy7                                         | 6D5                 | BioLegend                              |
| CD49a-PerCP-Cy5.5                                    | Ha31/8              | BioLegend                              |
| CD49b-FITC                                           | DX5                 | BioLegend                              |
| NK1.1-APC                                            | PK136               | BioLegend                              |
| NK1.1-PECy7                                          | PK136               | BioLegend                              |
| NK1.1-APC-Cy7                                        | PK136               | BioLegend                              |
| NKp46-APC                                            | 29A1.4              | BioLegend                              |
| NKp46-PE                                             | 29A1.4              | BioLegend                              |
| NKp46-APC-Cy7                                        | 29A1.4              | BioLegend                              |
| CD11b-BUV395                                         | M1/70               | eBioscience                            |

|                         |          |             |
|-------------------------|----------|-------------|
| PD1-FITC                | 29F.1A12 | BioLegend   |
| IFN $\gamma$ -eF450     | XMG1.2   | eBioscience |
| IFN $\gamma$ -AF700     | XMG1.2   | BioLegend   |
| IFN $\gamma$ -PE-Cy7    | XMG1.2   | eBioscience |
| IFN $\gamma$ -BV605     | XMG1.2   | BioLegend   |
| TNF $\alpha$ -BV605     | MP6-XT22 | BioLegend   |
| Granzyme B-AF647        | GB11     | BioLegend   |
| Granzyme B-Pacific Blue | GB11     | BioLegend   |
| H-2Kb-APC               | AF6-88.5 | BioLegend   |
| H-2Db-PE                | KH95     | BioLegend   |
| H-2Kd-PE-Cy7            | SF1-1.1  | BioLegend   |
